# Supplementary material for: Target of Rapamycin Complex 1 (TORC1), Protein Kinase A (PKA) and Cytosolic pH Regulate a Transcriptional Circuit for Lipid Droplet Formation
Source: MDPI journal article supplement (doi:10.3390/ijms22169017), 2021-08-20
Supplement: s1 [file s1]

Table S2

**Supplementary Table S2.** *S.cerevisiae* strains and plasmids used in this study.

| Strain                       | genotype/description                                         | Reference              |
|------------------------------|--------------------------------------------------------------|------------------------|
| BY4741                       | <i>MATa his3Δ1 leu2Δ0 ura3Δ0 met15</i>                       | EUROSCARF              |
| <i>dga1Δ</i>                 | <i>dga1Δ::KANMX4</i>                                         | EUROSCARF              |
| <i>lro1Δ</i>                 | <i>lro1Δ::HIS3MX6</i>                                        | This study             |
| <i>dga1Δ lro1Δ</i>           | <i>dga1Δ::natNT2 lro1Δ::HIS3MX6</i>                          | This study             |
| <i>sit4Δ</i>                 | <i>sit4Δ::KANMX6</i>                                         | EUROSCARF              |
| <i>sch9Δ</i>                 | <i>sch9Δ::KANMX4</i>                                         | EUROSCARF              |
| <i>vma1Δ</i>                 | <i>vma1Δ::KANMX4</i>                                         | EUROSCARF              |
| <i>tgl3Δ</i>                 | <i>tgl3Δ::KANMX4</i>                                         | EUROSCARF              |
| OEx <i>DGA1</i>              | <i>natNT2::GPD-3HA-DGA1</i>                                  | This study             |
| OEx <i>LRO1</i>              | <i>natNT2::GPD-3HA-LRO1</i>                                  | This study             |
| <i>snf1Δ</i>                 | <i>snf1Δ::KANMX4</i>                                         | (Pereira et al., 2020) |
| <i>sit4Δ snf1Δ</i>           | <i>sit4Δ::HIS3MX6 snf1Δ::KANMX4</i>                          | (Pereira et al., 2020) |
| <i>sfp1Δ</i>                 | <i>sfp1Δ::KANMX4</i>                                         | EUROSCARF              |
| <i>opilΔ</i>                 | <i>opilΔ::KANMX4</i>                                         | EUROSCARF              |
| <i>erd1Δ</i>                 | <i>erd1Δ::KANMX4</i>                                         | EUROSCARF              |
| <i>vma1Δ opilΔ</i>           | <i>vma1Δ::KANMX4 opilΔ::HIS3MX6</i>                          | This study             |
| <i>vph1Δ</i>                 | <i>vph1Δ::KANMX4</i>                                         | EUROSCARF              |
| <i>pma1-007</i>              | <i>YGL007WΔ::KANMX6</i>                                      | This study             |
| <i>scs2Δ opilΔ</i>           | <i>scs2Δ::KANMX4 opilΔ::HIS3MX6</i>                          | This study             |
| <i>ino2Δ</i>                 | <i>ino2Δ::KANMX4</i>                                         | EUROSCARF              |
| <i>rtg1Δ</i>                 | <i>rtg1Δ::KANMX4</i>                                         | EUROSCARF              |
| <i>mks1Δ</i>                 | <i>mks1Δ::HIS3MX6</i>                                        | This study             |
| <i>rtg1Δ mks1Δ</i>           | <i>rtg1Δ::KANMX4 mks1Δ::HIS3MX6</i>                          | This study             |
| <i>gln3Δ</i>                 | <i>gln3Δ::KANMX4</i>                                         | EUROSCARF              |
| <i>sit4Δ gln3Δ</i>           | <i>sit4Δ::KANMX4 gln3Δ::HIS3MX6</i>                          | This study             |
| <i>ure2Δ</i>                 | <i>ure2Δ::KANMX6</i>                                         | This study             |
| <i>RHA108</i>                | <i>MATa ade6 leu2-3,112 ura3-52 pep4-3 gal2 vma11Δ::LEU2</i> | (Parra and Kane, 1998) |
| <i>pct1Δ</i>                 | <i>pct1Δ::HIS3MX6</i>                                        | This study             |
| <i>vma1Δ pct1Δ</i>           | <i>vma1Δ::KANMX4 pct1Δ::HIS3MX6</i>                          | This study             |
| <i>ckilΔ</i>                 | <i>ckilΔ::HIS3MX6</i>                                        | This study             |
| <i>vma1Δ ckilΔ</i>           | <i>vma1Δ::KANMX4 pct1Δ::HIS3MX6</i>                          | This study             |
| OEx <i>DGK1</i>              | <i>natNT2::GPD-3HA-DGK1</i>                                  | This study             |
| <i>vma1Δ</i> OEx <i>DGK1</i> | <i>vma1Δ::KANMX4 natNT2::GPD-3HA-DGK1</i>                    | This study             |

| Plasmid                                                  | Reference                     |
|----------------------------------------------------------|-------------------------------|
| pYX212-EGFP-RBD-3 (URA3)                                 | (Leadsham et al., 2009)       |
| YEp213-Ras2-V19 (LEU2, 2μ)                               | (Broek et al., 1987)          |
| YEp13-PDE2 (LEU2, 2μ)                                    | (Gourlay and Ayscough, 2005)  |
| YEp357-prom <i>DGA1</i> -LacZ (LEU2, 2μ)                 | This study                    |
| VMA11-WT                                                 | (Parra and Kane, 1998)        |
| VMA11-E145L                                              | (Parra and Kane, 1998)        |
| pYB1903 (pRS426-GPD-pHlourin, URA3, 2μ)                  | (Dechant et al., 2010)        |
| pRS415-promOpi1-GFP (LEU2, CEN)                          | This study                    |
| GPDprom-Opi1-mCh (URA3, CEN)                             | (Romanauska and Kohler, 2018) |
| GPDprom-Opi1 <sup>mut</sup> -mCh (URA3, CEN)             | (Romanauska and Kohler, 2018) |
| pAW: ACC1 WT (URA3, 2μ)                                  | (Shi et al., 2014)            |
| pAD: ACC1 (S659A, S1157A, URA3, 2μ)                      | (Shi et al., 2014)            |
| YEp365-prom <i>INO1</i> -LacZ (LEU2, 2μ)                 | (Camelo et al., 2017)         |
| pYPGK18-IP6K1 WT (LEU2, 2μ)                              | (Yu et al., 2016)             |
| pYPGK18-IP6K1 SK/A (kinase dead, KD, LEU2, 2μ)           | (Yu et al., 2016)             |
| pJU676 (SCH9-5HA WT, URA3, CEN)                          | (Urban et al., 2007)          |
| pJU824 ( <i>sch9</i> -3E (T737E/S758E/S765E), URA3, CEN) | (Urban et al., 2007)          |
| pPL132 (HA3-TOR1 WT, LEU2, CEN)                          | (Reinke et al., 2006)         |
| pPL156 (pPL132, HA3-TOR1 I1954V mutation)                | (Reinke et al., 2006)         |

## References

1. Broek, D., T. Toda, T. Michaeli, L. Levin, C. Birchmeier, M. Zoller, S. Powers, and M. Wigler. The *S. cerevisiae* CDC25 gene product regulates the RAS/adenylate cyclase pathway. *Cell* 1987, 48, 789-799.
2. Camelo, C., F. Vilas-Boas, A.P. Cepeda, C. Real, J. Barros-Martins, F. Pinto, H. Soares, H.S. Marinho, and L. Cyrne. Opi1p translocation to the nucleus is regulated by hydrogen peroxide in *Saccharomyces cerevisiae*. *Yeast*. 2017, 34, 383-395.
3. Dechant, R., M. Binda, S.S. Lee, S. Pelet, J. Winderickx, and M. Peter. Cytosolic pH is a second messenger for glucose and regulates the PKA pathway through V-ATPase. *EMBO J.* 2010, 29, 2515-2526.
4. Gourlay, C.W., and K.R. Ayscough. Identification of an upstream regulatory pathway controlling actin-mediated apoptosis in yeast. *J Cell Sci.* 2005, 118, 2119-2132.
5. Leadsham, J.E., K. Miller, K.R. Ayscough, S. Colombo, E. Martegani, P. Sudbery, and C.W. Gourlay. Whi2p links nutritional sensing to actin-dependent Ras-cAMP-PKA regulation and apoptosis in yeast. *J Cell Sci.* 2009, 122, 706-715.
6. Parra, K.J., and P.M. Kane. Reversible association between the V1 and V0 domains of yeast vacuolar H<sup>+</sup>-ATPase is an unconventional glucose-induced effect. *Mol Cell Biol.* 1998, 18, 7064-7074.
7. Pereira, C., A.T. Pereira, and V. Costa. Activation of SNF1/AMPK mediates the mitochondrial derepression, resistance to oxidative stress and increased lifespan of cells lacking the phosphatase Sit4p. *Biochim Biophys Acta Mol Cell Res.* 2020, 1867, 118660.
8. Reinke, A., J.C. Chen, S. Aronova, and T. Powers. Caffeine targets TOR complex I and provides evidence for a regulatory link between the FRB and kinase domains of Tor1p. *J Biol Chem.* 2006, 281, 31616-31626.
9. Romanauska, A., and A. Kohler. The Inner Nuclear Membrane Is a Metabolically Active Territory that Generates Nuclear Lipid Droplets. *Cell.* 2018, 174:700-715 e718.
10. Shi, S., Y. Chen, V. Siewers, and J. Nielsen. Improving production of malonyl coenzyme A-derived metabolites by abolishing Snf1-dependent regulation of Acc1. *mBio.* 2014, 5, e01130-01114.
11. Urban, J., A. Soulard, A. Huber, S. Lippman, D. Mukhopadhyay, O. Deloche, V. Wanke, D. Anrather, G. Ammerer, H. Riezman, J.R. Broach, C. De Virgilio, M.N. Hall, and R. Loewith. Sch9 is a major target of TORC1 in *Saccharomyces cerevisiae*. *Mol Cell.* 2007, 26, 663-674.
12. Yu, W., C. Ye, and M.L. Greenberg. Inositol Hexakisphosphate Kinase 1 (IP6K1) Regulates Inositol Synthesis in Mammalian Cells. *J Biol Chem.* 2016, 291, 10437-10444.
