# Supplementary material for: Target of Rapamycin Complex 1 (TORC1), Protein Kinase A (PKA) and Cytosolic pH Regulate a Transcriptional Circuit for Lipid Droplet Formation
Source: MDPI journal article supplement (doi:10.3390/ijms22169017), 2021-08-20
Supplement: s1 [file s1]

Figure S4

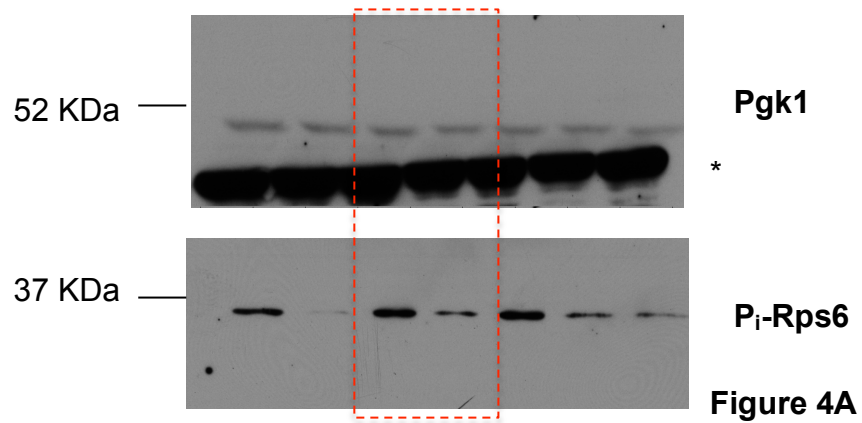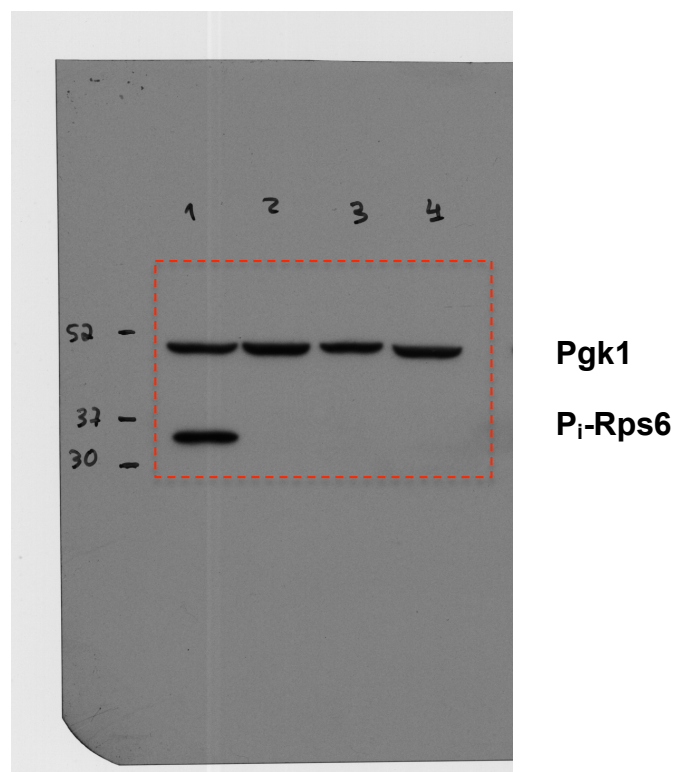

Figure 2B

**Supplementary Figure S4. The raw data of Western blot assays.** The figures display all blots used in this study and in dashed red the selected areas shown in the main text. \* unspecific band.
