# Supplementary material for: Target of Rapamycin Complex 1 (TORC1), Protein Kinase A (PKA) and Cytosolic pH Regulate a Transcriptional Circuit for Lipid Droplet Formation
Source: MDPI journal article supplement (doi:10.3390/ijms22169017), 2021-08-20
Supplement: s1 [file s1]

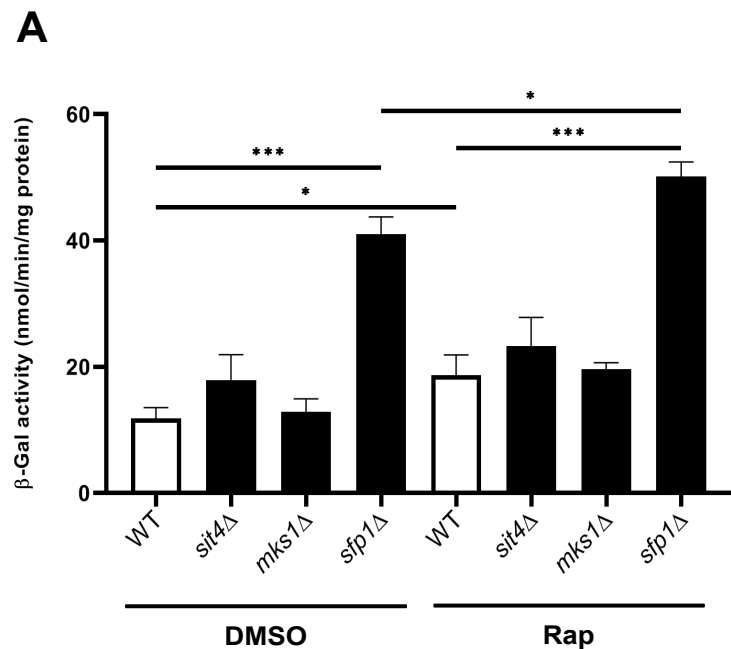

**B**

| Strain          | LD index (objects per cell) |
|-----------------|-----------------------------|
| WT              | 2,5                         |
| <i>vma1Δ</i>    | 3,6                         |
| <i>pma1-007</i> | 3,2                         |

**C**

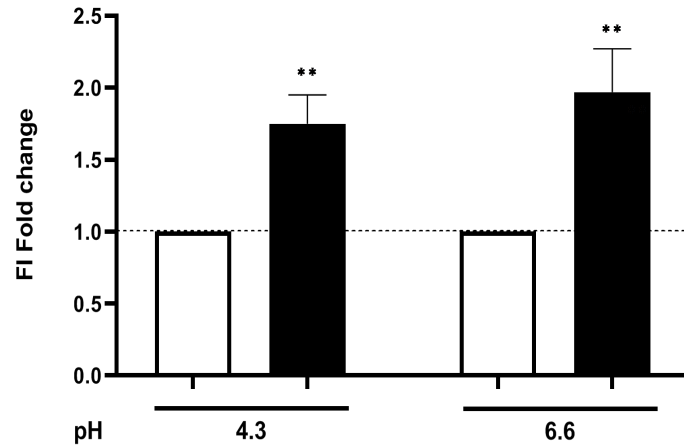

**D**

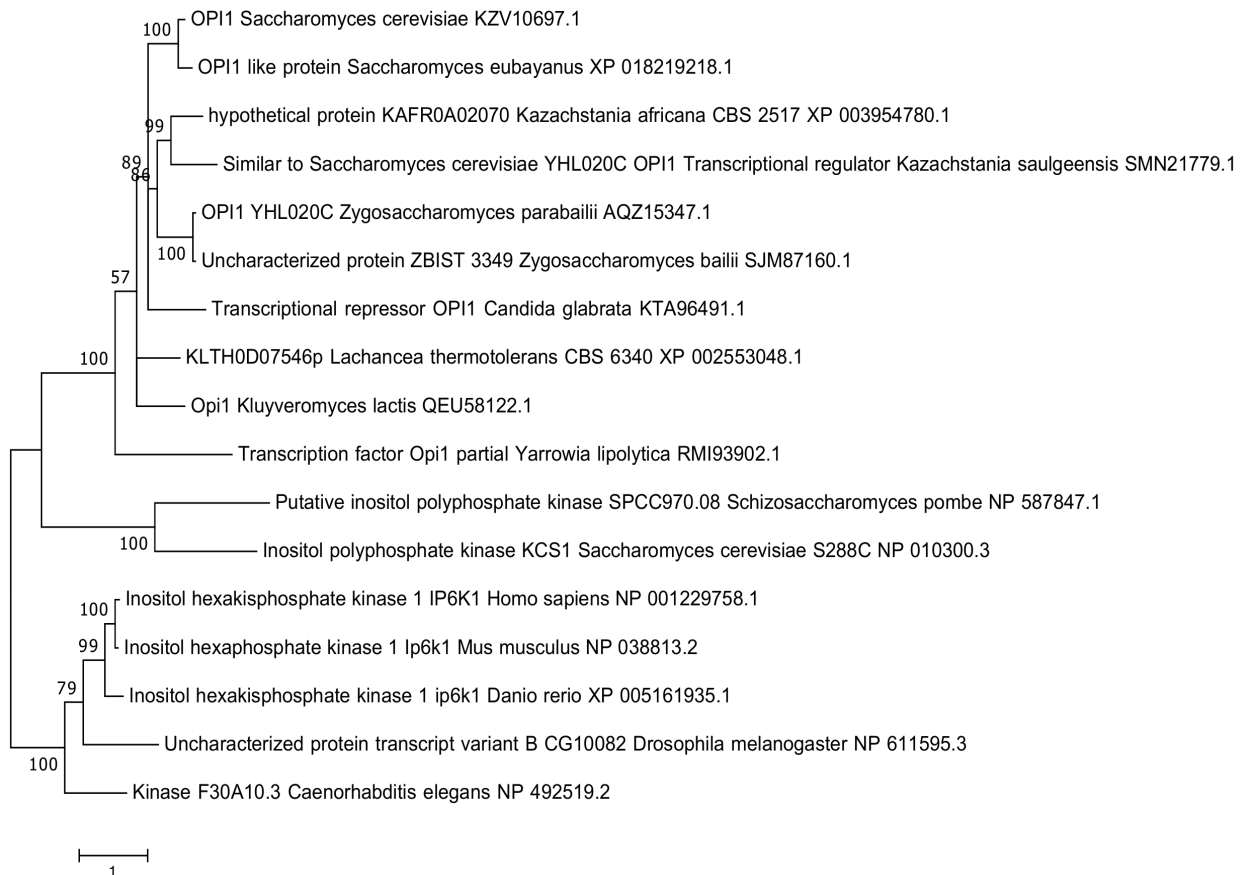

**Figure S2. Aberrant LD generation occurs in response to loss of intracellular pH homeostasis.** (A) Cells expressing YEp357-*DGA1*-LacZ were grown in SC medium lacking uracil to exponential phase and then treated with rapamycin (Rap, 200 ng/mL) or vehicle (DMSO) for 2 hours. Protein extracts were prepared, and specific  $\beta$ -galactosidase ( $\beta$ -Gal) activities, with o-nitrophenyl- $\beta$ -D-galactopyranoside (ONPG) as a substrate, were determined by measuring the amount of o-nitrophenol released by the galactosidase-catalyzed hydrolysis process. (B) *vma1Δ* and *pma1-007* cells display higher number of LDs, as defined by LD index (described in Materials and Methods). Cells were grown as described in Figure 1B. (C) Treatment with proton ionophore carbonyl cyanide 3-chlorophenylhydrazone (CCCP), which disrupts plasma membrane proton gradient, leads to increased fat content (black bars), irrespective of extracellular pH, thus phenocopying the *pma1-007* mutation. BODIPY493/503-associated fluorescence intensity (FI), which is a measure of LD content, was monitored by flow cytometry in the FL1 channel. For each condition, shown are FI fold changes vs. WT in the absence of CCCP. (D) The Bayesian phylogenetic tree revealed that *S. cerevisiae* Opi1 sequences are represented as a sister group relative to mammalian IP6K1 sequences. Results are mean $\pm$ SD of at least three independent experiments. \* $P\leq 0.05$ ; \*\* $P\leq 0.01$ ; \*\*\* $P\leq 0.001$ .
