# Supplementary material for: Target of Rapamycin Complex 1 (TORC1), Protein Kinase A (PKA) and Cytosolic pH Regulate a Transcriptional Circuit for Lipid Droplet Formation
Source: MDPI journal article supplement (doi:10.3390/ijms22169017), 2021-08-20
Supplement: s1 [file s1]

Table S1

**A**

List of potential transcription factors (TF) that have a binding sequence in the *DGA1* promoter regions (first 1000 bp upstream of the START codon), according to YEASTRACT+ (Monteiro et al., 2020).

| Transcription factor | Consensus binding site | Position |
|----------------------|------------------------|----------|
| Abf1p                | TCN{7}ACG              | -290     |
| Abf1p                | TCN{7}ACG              | -115     |
| Abf1p                | TCN{7}ACG              | -658     |
| Abf1p                | RTCRN{6}ACGNR          | -291     |
| Ash1p                | YTGAT                  | -303     |
| Ash1p                | YTGAT                  | -166     |
| Ash1p                | YTGAT                  | -388     |
| Ash1p                | YTGAT                  | -495     |
| Ash1p                | YTGAT                  | -805     |
| Azf1p                | AAAAGAAA               | -704     |
| Cat8p/Sip4p          | NCCDTYNVNCCGN          | -783     |
| Cbf1p                | TCACGTT                | -108     |
| Cup2p                | HTHNNGCTGD             | -708     |
| Fkh1p/Fkh2p          | RYMAAYA                | -114     |
| Fkh1p/Fkh2p          | RYMAAYA                | -811     |
| Fkh1p/Fkh2p          | AAACA                  | -116     |
| Gcn4p                | TGACTGA                | -287     |
| Gcr1p                | CTTCC                  | -214     |
| Gcr1p                | CTTCC                  | -147     |
| Gcr1p                | CTTCC                  | -268     |
| Gcr1p                | CTTCC                  | -588     |
| Gcr1p                | CWTCC                  | -777     |
| Gcr1p                | CWTCC                  | -214     |
| Gcr1p                | CWTCC                  | -147     |
| Gcr1p                | CWTCC                  | -268     |
| Gcr1p                | CWTCC                  | -588     |
| Gln3p                | GATTAG                 | -831     |
| Ino2p/Ino4p          | WYTTCAVRTGS            | -875     |
| Mot3p                | WAGGTA                 | -862     |
| Mot3p                | CAGGYA                 | -357     |
| Mot3p                | TAGGTA                 | -862     |
| Mot3p                | AAGGWT                 | -733     |
| Mot3p                | AAGGWT                 | -656     |
| Msn2p                | RGGGG                  | -577     |
| Msn2p                | RGGGG                  | -576     |

|                    |           |      |
|--------------------|-----------|------|
| <b>Ndt80p</b>      | CACAAA    | -757 |
| <b>Pho4p</b>       | CACGTK    | -107 |
| <b>Pip2p</b>       | CCGNNNTA  | -842 |
| <b>Rgt1p</b>       | CGGANNA   | -771 |
| <b>Rox1p</b>       | ACAAT     | -542 |
| <b>Rox1p</b>       | ACAAT     | -401 |
| <b>Rox1p</b>       | ACAAT     | -969 |
| <b>Rtg1p/Rtg3p</b> | GTCAC     | -9   |
| <b>Rtg1p/Rtg3p</b> | GGTAC     | -860 |
| <b>Skn7p</b>       | GGCCR     | -939 |
| <b>Skn7p</b>       | GGCCR     | -814 |
| <b>Skn7p</b>       | GGCCR     | -340 |
| <b>Skn7p</b>       | GGCCR     | -810 |
| <b>Stb5p</b>       | CGGNS     | -673 |
| <b>Stb5p</b>       | CGGNS     | -578 |
| <b>Stb5p</b>       | CGGNS     | -342 |
| <b>Stb5p</b>       | CGGNS     | -205 |
| <b>Stb5p</b>       | CGGNS     | -335 |
| <b>Stb5p</b>       | CGGNS     | -484 |
| <b>Stb5p</b>       | CGGNS     | -503 |
| <b>Stb5p</b>       | CGGNS     | -779 |
| <b>Xbp1p</b>       | CTCGA     | -946 |
| <b>Xbp1p</b>       | CTCGA     | -553 |
| <b>Yap1p</b>       | TKACAAA   | -892 |
| <b>Yap1p</b>       | TACTCA    | -844 |
| <b>Yrr1p</b>       | WCCGYKKWW | -488 |
| <b>Pho2p</b>       | WTAWTW    | -430 |
| <b>Pho2p</b>       | WTAWTW    | -422 |
| <b>Pho2p</b>       | WTAWTW    | -418 |
| <b>Pho2p</b>       | WTAWTW    | -877 |
| <b>Mot2p</b>       | ATATA     | -476 |
| <b>Mot2p</b>       | ATATA     | -474 |
| <b>Mot2p</b>       | ATATA     | -47  |
| <b>Mot2p</b>       | ATATA     | -470 |

## B

List of documented regulations, according to YEASTRACT+ (Monteiro et al., 2020), and filtered by:

- a) DNA binding plus expression evidence;
- b) TF acting as activator or inhibitor.

|               |
|---------------|
| <b>Aca1p</b>  |
| <b>Bas1p</b>  |
| <b>Fhl1p</b>  |
| <b>Hal9p</b>  |
| <b>Ino2p</b>  |
| <b>Msn2p</b>  |
| <b>Msn4p</b>  |
| <b>Rtg1p</b>  |
| <b>Rpn4p</b>  |
| <b>Sfp1p</b>  |
| <b>Sok2p</b>  |
| <b>Sut1p</b>  |
| <b>Gat1p</b>  |
| <b>Pdr1p</b>  |
| <b>Pdr3p</b>  |
| <b>Yap1p</b>  |
| <b>Gcn4p</b>  |
| <b>Met28p</b> |
| <b>Cbf1p</b>  |
| <b>Met31p</b> |
| <b>Adr1p</b>  |

## References

1. Monteiro, P.T., J. Oliveira, P. Pais, M. Antunes, M. Palma, M. Cavalheiro, M. Galocha, C.P. Godinho, L.C. Martins, N. Bourbon, M.N. Mota, R.A. Ribeiro, R. Viana, I. Sa-Correia, and M.C. Teixeira. YEASTRACT+: a portal for cross-species comparative genomics of transcription regulation in yeasts. *Nucleic Acids Res.* **2020**, *48*, 642-649.
