# Supplementary material for: Target of Rapamycin Complex 1 (TORC1), Protein Kinase A (PKA) and Cytosolic pH Regulate a Transcriptional Circuit for Lipid Droplet Formation
Source: MDPI journal article supplement (doi:10.3390/ijms22169017), 2021-08-20
Supplement: s1 [file s1]

Archive with 6 entries (6 files):
- Figure S1_IJMS.pdf
- Figure S2_IJMS.pdf
- Figure S3_IJMS.pdf
- Figure S4_IJMS.pdf
- Table S1A and S1B_.pdf
- Table S2.pdf
